# Supplementary material for: Altered longitudinal trajectory of default mode network connectivity in healthy youth with subclinical depressive and posttraumatic stress symptoms
Source: PubMed Central journal article supplement — Dev Cogn Neurosci. 2023 Feb 17;60:101216. doi: 10.1016/j.dcn.2023.101216 (PMC9986502; doi:10.1016/j.dcn.2023.101216), 2023-02-17

## **Supplemental Materials:**

### ***Altered Longitudinal Trajectory of Default Mode Network Connectivity in Healthy Youth with Subclinical Depressive and Posttraumatic Stress Symptoms***

#### ***LGCM Results for the Medial Temporal Subsystem of the DMN***

The baseline medial temporal (MT) subsystem model without predictors or control variables had excellent fit ( $\chi^2(1) = 0.126, p = .72$ ; RMSEA = 0.000, 90% CI[0.00, 0.137]; CFI = 1.00). Using the motion-corrected residuals of DMN connectivity as the inputs for our model, the mean of the latent intercept indicated that across the whole sample, average DMN connectivity was 0.000 ( $p = .947$ ) and the latent slope indicated that there was no systematic change in DMN connectivity over time (mean = -0.001,  $p = .874$ ). In contrast, there was significant variability in the slope (mean = 0.005,  $p = .007$ ) and trending significance for the intercept (mean = 0.005,  $p = .053$ ). We then imposed age, sex, and site as control variables on the estimated latent intercept and slope variables. The model had good fit ( $\chi^2(4) = 6.43, p = .17$ ; RMSEA = 0.057, 90% CI[0.00, 0.134]; CFI = .84). No effects of age ( $\beta = .026, b = 0.001, p = .813$ ), sex ( $\beta = .152, b = 0.020, p = .157$ ), or site ( $\beta = -.120, b = -0.016, p = .268$ ) were found on the latent intercept. The slope of change in mean DMN connectivity was not associated with age ( $\beta = -.217, b = -0.009, p = .072$ ), sex ( $\beta = -.074, b = -0.011, p = .526$ ), or site ( $\beta = -.017, b = -0.002, p = .886$ ). In this model, we found no systematic changes in DMN connectivity over time. We then included the TSCC symptom scores to generate a final model with good fit ( $\chi^2(6) = 6.88, p = .33$ ; RMSEA = 0.028, 90% CI[0.00, 0.101]; CFI = .99). Age at time 1 was significantly associated with depressive ( $\beta = -.177, b = -0.279, p = .012$ ) and posttraumatic symptoms ( $\beta = -.222, b = -0.594, p = .002$ ), though it was not significantly associated with the latent intercept ( $\beta = -.122, b = 0.002, p = .724$ ) or latent slope ( $\beta = -.003, b = -0.008, p = .107$ ) variables. Site was significantly associated with depressive ( $\beta = .147, b = 0.804, p = .038$ ) and posttraumatic ( $\beta = .144, b = 1.341, p = .042$ ) symptoms, though it was not significantly associated with the latent intercept ( $\beta = -.122, b = -0.017, p = .260$ ) or latent slope ( $\beta = -.177, b = 0.000, p = .982$ ) variables. Sex did not show any associations with the other variables. The association between depressive symptoms and the latent slope was trending ( $\beta = -.269, b = -0.007, p = .074$ ), while no significant association between depressive symptoms and latent intercept were detected ( $\beta = -.039, b = -0.001, p = .770$ ). No significant effect of posttraumatic stress symptoms on the latent intercept ( $\beta = .083, b = 0.001, p = .534$ ) and latent slope ( $\beta = .215, b = 0.003, p = .155$ ) was detected.

#### ***LGCM Results for the Core Subsystem of the DMN***

The baseline core subsystem model without predictors or control variables had excellent fit ( $\chi^2(1) = .013, p = .91$ ; RMSEA = 0.000, 90% CI[0.00, 0.079]; CFI = 1.00). Using the motion-corrected residuals of DMN connectivity as the inputs for our model, the mean of the latent intercept indicated that across the whole sample, average DMN connectivity was 0.003 ( $p = .979$ ) and the latent slope indicated that there was no systematic change in DMN connectivity over time (mean = 0.014,  $p = .903$ ). In contrast, there was significant variability for both the slope (mean = 0.006,  $p = .001$ ) and intercept (mean = 0.007,  $p = .008$ ). We then imposed age, sex, and site as control variables on the estimated latent intercept and slope variables. The model had excellent fit ( $\chi^2(4) = 4.291, p = .39$ ; RMSEA = 0.020, 90% CI[0.00, 0.113]; CFI = .98). No effects of age ( $\beta = .114, b = 0.006, p = .222$ ), sex ( $\beta = .120, b = 0.020, p = .194$ ), or site ( $\beta = .044, b = 0.007, p = .634$ ) were found on the latent intercept. The slope of change in mean DMN connectivity was not associated with age ( $\beta = -.164, b = -0.007, p = .145$ ), sex ( $\beta = -.095, b = 0.001, p = .390$ ), or site ( $\beta = -.019,$

$b = -0.003, p = .862$ ). In this model, we found no systematic changes in DMN connectivity over time. We then included the TSCC symptom scores to generate a final model with excellent fit ( $\chi^2(6) = 4.035, p = .67$ ; RMSEA = 0.000, 90% CI[0.00, 0.074]; CFI = 1.00). Age at time 1 was significantly associated with depressive ( $\beta = -.177, b = -0.278, p = .012$ ) and posttraumatic symptoms ( $\beta = -0.223, b = -0.595, p = .002$ ), though it was not significantly associated with the latent intercept ( $\beta = .116, b = 0.005, p = .236$ ) or latent slope ( $\beta = -.145, b = -0.006, p = .208$ ) variables. Site was significantly associated with depressive ( $\beta = .148, b = 0.810, p = .037$ ) and posttraumatic ( $\beta = .143, b = 1.332, p = .042$ ) symptoms, though it was not significantly associated with the latent intercept ( $\beta = .047, b = 0.008, p = .629$ ) or latent slope ( $\beta = -.005, b = -0.001, p = .996$ ) variables. Sex did not show any associations with the other variables. The association between depressive symptoms and the latent slope was trending ( $\beta = -.254, b = -0.007, p = .077$ ), while no significant association between depressive symptoms and latent intercept were detected ( $\beta = -.029, b = -0.001, p = .805$ ). No significant effect of posttraumatic stress symptoms on the latent intercept ( $\beta = .019, b = 0.000, p = .873$ ) and latent slope ( $\beta = .223, b = 0.004, p = .118$ ) was detected.

#### *LGCM Results for the Dorsal Medial Prefrontal Cortex Subsystem of the DMN*

The baseline dmPFC subsystem model without predictors had excellent fit ( $\chi^2(1) = .002, p = .96$ ; RMSEA = 0.000, 90% CI[0.00, 0.000]; CFI = 1.00). Using the motion-corrected residuals of DMN connectivity as the inputs for our model, the mean of the latent intercept indicated that across the whole sample, average DMN connectivity was 0.000 ( $p = .973$ ) and the latent slope indicated that there was no systematic change in DMN connectivity over time (mean = .000,  $p = .998$ ). In contrast, there was trending significance for variability in both the slope (mean = 0.003,  $p = .054$ ) and intercept (mean = 0.004,  $p = .082$ ). We then imposed the control variables on the estimated latent intercept and slope variables. This model had excellent fit ( $\chi^2(4) = 3.145, p = .53$ ; RMSEA = 0.000, 90% CI[0.00, 0.098]; CFI = 1.00). No effects of age ( $\beta = .114, b = 0.000, p = .996$ ), sex ( $\beta = .114, b = 0.007, p = .619$ ), or site ( $\beta = .114, b = 0.009, p = .509$ ) were found on the latent intercept. The slope of change in mean DMN connectivity was not associated with age ( $\beta = .114, b = -0.004, p = .338$ ), sex ( $\beta = .114, b = -0.012, p = .424$ ), or site ( $\beta = .114, b = -0.008, p = .617$ ). We found no systematic changes in DMN connectivity over time. We then included the TSCC symptom scores to generate a final model with excellent fit ( $\chi^2(6) = 3.930, p = .68$ ; RMSEA = 0.000, 90% CI[0.00, 0.073]; CFI = 1.00). Age at time 1 was significantly associated with depressive ( $\beta = -.177, b = -0.278, p = .013$ ) and posttraumatic symptoms ( $\beta = -.223, b = -0.595, p = .001$ ), though it was not significantly associated with the latent intercept ( $\beta = -.013, b = -0.003, p = .510$ ) or latent slope ( $\beta = -.091, b = 0.000, p = .910$ ) variables. Site was significantly associated with depressive ( $\beta = .147, b = 0.806, p = .038$ ) and posttraumatic ( $\beta = .144, b = 1.333, p = .042$ ) symptoms, though it was not significantly associated with the latent intercept ( $\beta = .078, b = 0.010, p = .494$ ) or latent slope ( $\beta = -.050, b = -0.006, p = .714$ ) variables. Sex did not show any associations with the other variables. Youth who self-reported more depressive symptoms tended to have decreased DMN connectivity over time ( $\beta = -.524, b = -0.011, p = .003$ ). Posttraumatic stress symptoms showed the opposite pattern, where youth who self-reported more posttraumatic stress symptoms tended to have increased DMN connectivity over time ( $\beta = .519, b = 0.006, p = .003$ ). No significant effects of depressive symptoms ( $\beta = .123, b = 0.003, p = .382$ ) or posttraumatic stress symptoms ( $\beta = -.184, b = -0.002, p = .191$ ) were detected on the latent intercept variable.

Supplementary Table 1: Complete Correlation Matrix for Variables of Interest Included in the Final Model

|               | Site  | Sex   | Age     | DEP    | PTS   | THP   | 1DMN   | 2DMN   | 3DMN   | 1MT    | 1Core  | 1dmPFC | 2MT    | 2Core  | 2dmPFC | 3MT    | 3Core  |
|---------------|-------|-------|---------|--------|-------|-------|--------|--------|--------|--------|--------|--------|--------|--------|--------|--------|--------|
| <b>Site</b>   | ---   |       |         |        |       |       |        |        |        |        |        |        |        |        |        |        |        |
| <b>Sex</b>    | -0.02 | ---   |         |        |       |       |        |        |        |        |        |        |        |        |        |        |        |
| <b>Age</b>    | -0.05 | -0.06 | ---     |        |       |       |        |        |        |        |        |        |        |        |        |        |        |
| <b>DEP</b>    | 0.16* | 0.08  | -0.19** | ---    |       |       |        |        |        |        |        |        |        |        |        |        |        |
| <b>PTS</b>    | 0.16* | 0.05  | -0.23** | 0.59** | ---   |       |        |        |        |        |        |        |        |        |        |        |        |
| <b>THP</b>    | -0.05 | 0.00  | -0.12   | 0.28   | 0.50  | ---   |        |        |        |        |        |        |        |        |        |        |        |
| <b>1DMN</b>   | 0.07  | 0.07  | 0.06    | 0.01   | -0.01 | -0.06 | ---    |        |        |        |        |        |        |        |        |        |        |
| <b>2DMN</b>   | 0.01  | 0.01  | -0.15   | -0.13  | 0.10  | 0.09  | 0.18   | ---    |        |        |        |        |        |        |        |        |        |
| <b>3DMN</b>   | 0.04  | -0.01 | -0.03   | -0.13  | 0.08  | -0.06 | 0.00   | 0.34   | ---    |        |        |        |        |        |        |        |        |
| <b>1MT</b>    | -0.08 | 0.10  | 0.05    | -0.02  | 0.02  | -0.11 | 0.43** | 0.19   | 0.02   | ---    |        |        |        |        |        |        |        |
| <b>1Core</b>  | 0.04  | 0.09  | 0.10    | -0.02  | -0.01 | -0.09 | 0.90** | 0.22   | 0.05   | 0.47** | ---    |        |        |        |        |        |        |
| <b>1dmPFC</b> | 0.04  | 0.03  | 0.02    | 0.02   | -0.07 | -0.05 | 0.90** | 0.15   | -0.02  | 0.36** | 0.71** | ---    |        |        |        |        |        |
| <b>2MT</b>    | -0.15 | 0.09  | -0.26** | -0.03  | 0.10  | 0.04  | 0.04   | 0.63** | 0.27*  | 0.14   | 0.04   | 0.06   | ---    |        |        |        |        |
| <b>2Core</b>  | -0.04 | 0.04  | -0.14   | -0.08  | 0.07  | 0.10  | 0.13   | 0.93** | 0.35** | 0.18*  | 0.22*  | 0.11   | 0.64** | ---    |        |        |        |
| <b>2dmPFC</b> | 0.02  | -0.01 | -0.19*  | -0.10  | 0.10  | 0.08  | 0.18*  | 0.92** | 0.31** | 0.17   | 0.19*  | 0.19*  | 0.61** | 0.79** | ---    |        |        |
| <b>3MT</b>    | -0.02 | -0.03 | -0.08   | -0.16* | 0.09  | -0.03 | -0.06  | 0.28** | 0.81** | -0.02  | -0.01  | -0.07  | 0.32** | 0.31** | 0.26** | ---    |        |
| <b>3Core</b>  | 0.05  | -0.02 | -0.04   | -0.13  | 0.07  | -0.07 | -0.05  | 0.35** | 0.95** | -0.03  | 0.01   | -0.08  | 0.30** | 0.40** | 0.30** | 0.83** | ---    |
| <b>3dmPFC</b> | -0.04 | -0.04 | 0.00    | -0.15  | 0.06  | -0.11 | 0.04   | 0.27** | 0.94** | 0.02   | 0.06   | 0.07   | 0.26*  | 0.27*  | 0.30** | 0.79** | 0.87** |

Site: 0 = UNMC, 1 = MRN; Sex: 0 = male, 1 = female; Age = age at year 1; DEP = depressive symptoms; PTS = posttraumatic stress symptoms; #DMN = Year # residual connectivity values following motion correction for the Default Mode Network from the Yeo-7 atlas. #MT = Year # residual connectivity values following motion correction for the Medial Temporal subnetwork. #Core = Year # residual connectivity values following motion correction for the Core subnetwork. #dmPFC = Year # residual connectivity values following motion correction for the dmPFC subnetwork. \* indicates  $p < 0.05$ , \*\* indicates  $p < 0.01$ .

Supplemental Table 2: Latent Growth Curve Model Fit for the Medial Temporal, Core, and Dorsal Medial Prefrontal Cortex Subsystems of the Default Mode Network

| <b>Model</b>                              | <b><math>\chi^2</math> (p value)</b> | <b>df</b> | <b><math>\Delta\chi^2</math></b> | <b>p value</b> | <b>RMSEA</b> | <b>90% CI</b> | <b>CFI</b> |
|-------------------------------------------|--------------------------------------|-----------|----------------------------------|----------------|--------------|---------------|------------|
| Medial Temporal                           | 0.13 (.72)                           | 1         | -                                | -              | 0.000        | 0.00, 0.137   | 1.00       |
| Medial Temporal + control                 | 6.43 (.17)                           | 4         | 6.30                             | .098           | 0.057        | 0.00, 0.134   | 0.84       |
| Medial Temporal + control + TSCC          | 6.88 (.33)                           | 6         | 0.45                             | .799           | 0.028        | 0.00, 0.101   | 0.99       |
| Core                                      | 0.01 (.91)                           | 1         | -                                | -              | 0.000        | 0.00, 0.079   | 1.00       |
| Core + control                            | 4.29 (.39)                           | 4         | 4.28                             | .233           | 0.020        | 0.00, 0.113   | 0.98       |
| Core + control + TSCC                     | 4.04 (.67)                           | 6         | -0.25                            | .000           | 0.000        | 0.00, 0.074   | 1.00       |
| Dorsal Medial Prefrontal                  | 0.00 (.96)                           | 1         | -                                | -              | 0.000        | 0.00, 0.000   | 1.00       |
| Dorsal Medial Prefrontal + control        | 3.15 (.53)                           | 4         | 3.15                             | .369           | 0.000        | 0.00, 0.098   | 1.00       |
| Dorsal Medial Prefrontal + control + TSCC | 3.93 (.68)                           | 6         | 0.78                             | .677           | 0.000        | 0.00, 0.073   | 1.00       |

Control = control variables including age, sex, and site. TSCC = Trauma Symptom Checklist for Children;  $\chi^2$  = chi-square test of model fit; df = degrees of freedom;  $\Delta\chi^2$  = change in chi-square; RMSEA = root mean square error of approximation; 90% CI = 90% confidence interval about the RMSEA; CFI = comparative fit index.

Supplementary Figure 1: Age of the sample (mean and standard deviation) over three years for the UNMC and MRN sites.

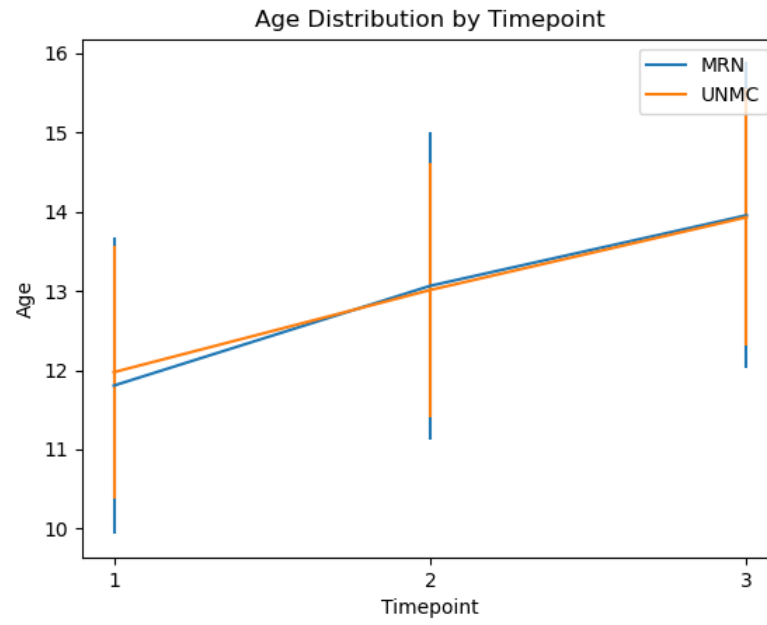

Supplementary Figure 2: Distribution of depressive symptoms, posttraumatic symptoms, and trauma history profile (THP) data

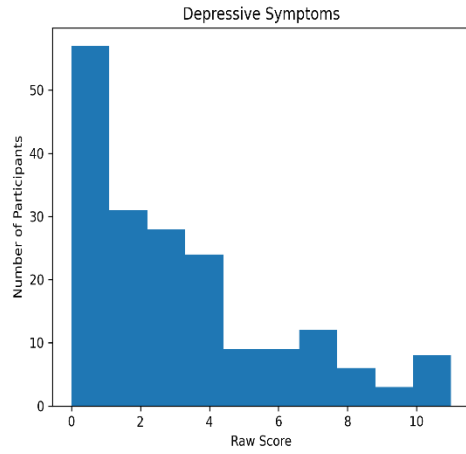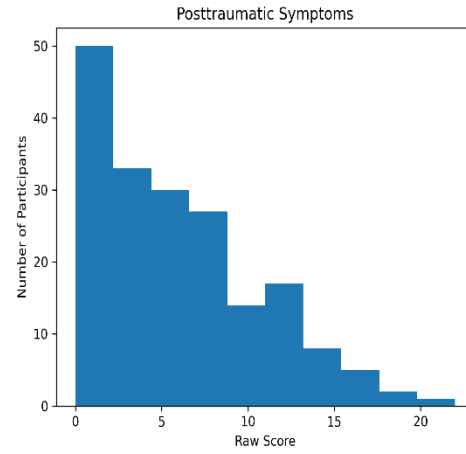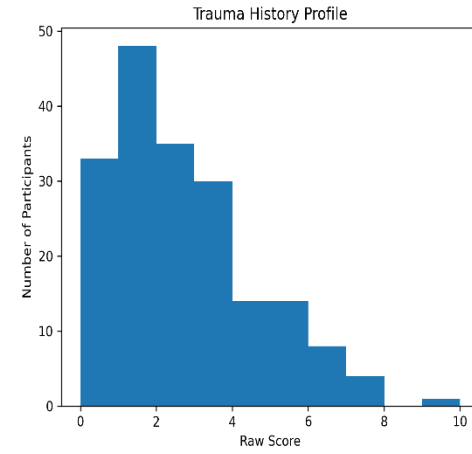

Supplement: mmc2.pdf [file mmc2.pdf]
